# Supplementary material
Source: MDPI journal article supplement (https://www.mdpi.com/2311-5637/8/4/159)

## Supplementary Material

Figure S1: Pictorial diagram of the storage reactors

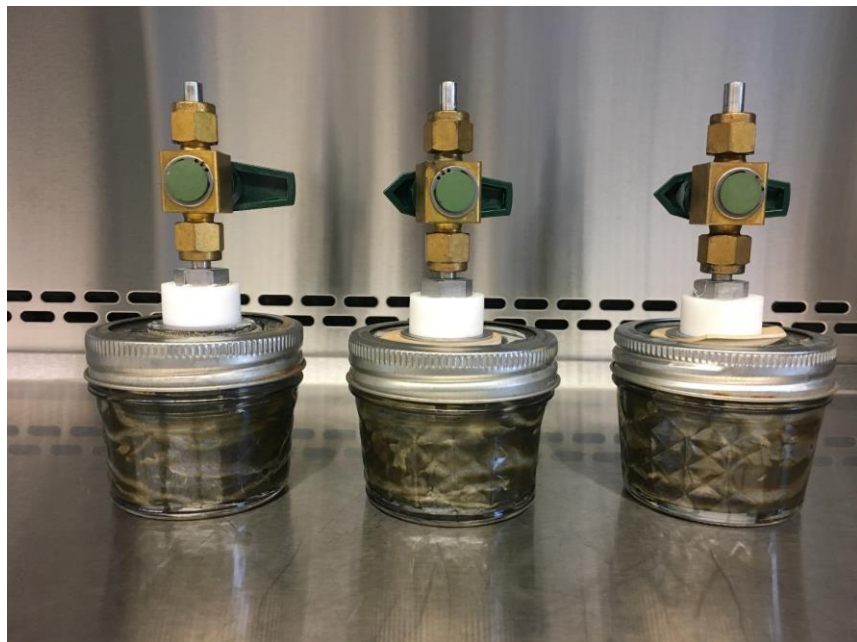

Supplement: s1 [file s1 › fermentation-1643114-supplementary.pdf]
